# Supplementary material for: Second primary malignancies induced by radioactive iodine treatment of differentiated thyroid carcinoma — a critical review and evaluation of the existing evidence
Source: PubMed Central journal article supplement (PMC9250458; doi:10.1007/s00259-022-05762-4), 2022-03-23
Supplement: 259_2022_5762_MOESM3_ESM.pdf [file 259_2022_5762_MOESM3_ESM.pdf]

**Online Resource 3:** Presented are detailed data about included papers (first author, year of publication), extracted data (country of the included cohort, relative effect endpoint and results, crude incidence of SPMs, follow-up period, number of participants, rate of patients treated with RAI) and the evaluated risk of bias of each study. Abbreviations: aHR, adjusted hazard ratio; CI, confidence interval; HR, hazard ratio; IQR, interquartile range; OR, odds ratio; RAI, radioactive iodine; ROB, risk of bias; RR, relative risk; SEER, Surveillance, Epidemiology, and End Results Program; SHM, secondary hematologic malignancy; SIR, standardized incidence ratio; SPM, second primary malignancy.

| Occurrence of SPMs in patients treated with RAI versus without RAI |                         |              |                                                                                                                                             |                                                                                            |                                             |                                  |                                      |
|--------------------------------------------------------------------|-------------------------|--------------|---------------------------------------------------------------------------------------------------------------------------------------------|--------------------------------------------------------------------------------------------|---------------------------------------------|----------------------------------|--------------------------------------|
| Study/ Citation                                                    | Cohort/Country          | Risk of bias | Relative effect endpoint                                                                                                                    | Results                                                                                    | Crude Incidence of SPM                      | Follow-up period                 | Participants (rate of RAI treatment) |
| Silva-Vieira, 2017 [15]                                            | Portugal                | Moderate     | RR of “treatment with radioiodine – yes versus no“                                                                                          | 1.84 (95% CI: 1.02–3.31)                                                                   | Total: 6.4%<br>RAI(+): 6.9%<br>RAI(-): 4.8% | Median: 8.8y<br>Range: 5.0-17.0y | 2,031 (77%)                          |
| Hirsch, 2016 [19]                                                  | Israel                  | Critical     | HR “for SPM in patients after first RAI treatment compared to patients with no RAI treatment, adjusted for age and sex”                     | 1.27 (95% CI: 0.88–1.82)                                                                   | Total: 9.3%                                 | Mean ± SD:<br>9.3 ± 9.6y         | 1,792 (81.9%)                        |
| Khang, 2015 [20]                                                   | Korea                   | Critical     | OR [RAI(+) vs. RAI(-)]                                                                                                                      | 1.14 (95% CI: 0.672–1.915)                                                                 | Total: 2.5%                                 | Median: 7.0y<br>Range: 1.0-33.0y | 2,468 (56.6%)                        |
| Rubino, 2003 [16]                                                  | Sweden/Italy/<br>France | Serious      | RR, stratified by study group and adjusted for external radiotherapy: I-131 vs. no I-131                                                    | 1.2 (95% CI: 1.0-1.4)                                                                      | Total: 8.4%                                 | Mean: 13y<br>Range: 2-55y        | 6,841 (62%)                          |
| Teng, 2016 [21]                                                    | Taiwan                  | Serious      | aHR of the cumulative RAI activity per 30 mCi [1.11 GBq] increase; patients receiving external beam radiation or chemotherapy were excluded | 1.01 (95% CI: 1.00-1.02)                                                                   | Total: 3.4%                                 | Median: 5.9y<br>IQR: 3.1-9.9y    | 20,235 (58.3%)                       |
| Hakala, 2016 [22]                                                  | Finland                 | Critical     | Two numerical results were analyzed to compare the two <b>rate ratios (RR)</b> for no RAI vs. controls and RAI vs. controls                 | No RAI vs controls: 1.49 (95% CI: 0.96–2.30)<br>RAI vs. controls: 1.04 (95% CI: 0.83–1.32) | Total: 12%                                  | Mean ± SD:<br>16.2 ± 6.9y        | 910 (81%)                            |
| Lang, 2012 [39]                                                    | Hong Kong               | Moderate     | <b>SIR</b>                                                                                                                                  | RAI(+) group: 1.51 (95% CI: 1.14–1.96)<br>RAI(-) group: 0.84 (95% CI: 0.36–1.66)           | Total: 7.2%                                 | Median: 7.8y<br>Range: 2.0-47.6y | 895 (71.8%)                          |
| Brown, 2008 [18]                                                   | SEER, U.S.              | Serious      | <b>SIR</b> , <36-month latency exclusion, 1988-2002 exclusion, all sites of SPM                                                             | No radiotherapy: 1.04 (95% CI: 0.9–1.2)<br>“Radioisotopes”: 1.23 (95% CI: 1.04–1.45)       | Total: 7.1%                                 | Median: 8.6y<br>Range: 0.2-29.9y | 30,278 (44.0%)                       |

| Dose-response relationship – Occurrence of SPM according to cumulative RAI activity |                |             |                                                                                                                                                |                                                                                                                                                                                                                               |                                             |                                  |                                      |
|-------------------------------------------------------------------------------------|----------------|-------------|------------------------------------------------------------------------------------------------------------------------------------------------|-------------------------------------------------------------------------------------------------------------------------------------------------------------------------------------------------------------------------------|---------------------------------------------|----------------------------------|--------------------------------------|
| Study                                                                               | Cohort/Country | Overall RoB | Relative effect endpoint(s)                                                                                                                    | Results                                                                                                                                                                                                                       | Crude Incidence of SPM                      | Follow-up period                 | Participants (rate of RAI treatment) |
| Silva-Vieira, 2017 [15]                                                             | Portugal       | Moderate    | <b>HR</b> – Cox regression model (no competitive risk) – Cumulative activity each activity subgroup vs. 0 mCi [0 GBq]                          | <100 mCi [<3.7 GBq]: 1.16 (95% CI: 0.44–3.06)<br>100–199 mCi [3.7–7.363 GBq]: 1.76 (95% CI: 0.95–3.28)<br>200–299 mCi [7.4–11.063 GBq]: 2.53 (95% CI: 1.21–5.30)<br>≥300 mCi [≥11.1 GBq]: 2.45 (95% CI: 1.12–5.36)            | Total: 6.4%<br>RAI(+): 6.9%<br>RAI(-): 4.8% | Median: 8.8y<br>Range: 5.0-17.0y | 2,031 (77%)                          |
| Teng, 2016 [21]                                                                     | Taiwan         | Serious     | <b>aHR</b> according to the cumulative radioactive activity category; patients receiving external beam radiation or chemotherapy were excluded | 1-30 mCi [0.037–1.11GBq] : 1.05 (95% CI: 0.81–1.35)<br>>30–100 mCi [>1.11–3.7 GBq] : 1.07 (95% CI: 0.85–1.34)<br>>100–150 mCi [>3.7–5.55 GBq] : 1.13 (95% CI: 0.85–1.50)<br>>150 mCi [>5.55 GBq] : 1.52 (95% CI: 1.19 - 1.95) | Total: 3.4%                                 | Median: 5.9y<br>IQR: 3.1-9.9y    | 20,235 (58.3%)                       |
| Hirsch, 2016 [19]                                                                   | Israel         | Critical    | <b>HR</b> depending on cumulative activity category [in mCi]                                                                                   | 1–100 [0.037–3.7 GBq]: 1.5 (95% CI: 0.99–2.3)<br>101–150 [3.737–5.55GBq]: 1.3 (95% CI: 0.8–2.1)<br>151–299 [5.587–11.063 GBq]: 0.7 (95% CI: 0.3–1.5)<br>≥300 [≥11.1 GBq]: 13 (95% CI: 0.8–2.4)                                | Total: 9.3%                                 | Mean ± SD:<br>9.3 ± 9.6y         | 1,792 (81.9%)                        |
| Hakala, 2016 [22]                                                                   | Finland        | Critical    | (Patients vs. controls) as <b>Rate ratio (RR)</b> for subgroups according to their cumulative RAI activity                                     | ≤3.7 GBq: 0.94 (95% CI: 0.70–1.25)<br>>3.7 GBq: 1.37 (95% CI: 0.90–2.09)                                                                                                                                                      | Total: 12%                                  | Mean ± SD:<br>16.2 ± 6.9y        | 910 (81%)                            |
| Khang, 2015 [20]                                                                    | Korea          | Critical    | <b>OR</b> [RAI(+)] according to cumulative activity group vs. RAI(-)]                                                                          | 1.1–5.55 GBq: 0.87 (95% CI: 0.469–1.620)<br>5.56–22.2 GBq: 0.67 (95% CI: 0.272–1,659)<br>22.3–36.9 GBq: 2.04 (95% CI: 0.477–8.696)<br>≥37.0 GBq: 5.54 (95% CI: 2.635-11.634)                                                  | Total: 2.5%                                 | Median: 7.0y<br>Range: 1.0-33.0y | 2,468 (56.6%)                        |

|                    |                       |          |                                                                                                                                                                         |                                                                                                                                                                                                                             |             |                                          |             |
|--------------------|-----------------------|----------|-------------------------------------------------------------------------------------------------------------------------------------------------------------------------|-----------------------------------------------------------------------------------------------------------------------------------------------------------------------------------------------------------------------------|-------------|------------------------------------------|-------------|
| Lang, 2012 [39]    | Hong Kong             | Moderate | <b>RR</b> , Cox proportional hazards analysis, cumulative RAI activity [GBq]                                                                                            | None: Reference<br>3.0–8.9 GBq: 2.777 (95% CI: 1.089–7.145)<br>>9.0 GBq: 3.149 (95% CI: 0.645–12.816)                                                                                                                       | Total: 7.2% | Median: 7.8y<br>Range: 2.0–47.6y         | 895 (71.8%) |
| Fallahi, 2011 [38] | Iran                  | Serious  | <b>OR</b> of SPM with increasing cumulative activity of RAI                                                                                                             | <10 GBq: 1.00 (reference)<br>10–20 GBq: 3.11 (95% CI: 0,24-39,83)<br>20–30 GBq: 9.29 (95% CI: 0,69-125,01)<br>30–40 GBq: No SPM cases<br>40–50 GBq: 113.42 (95% CI: 8,60-1495,64)<br>≥50 GBq: 122.90 (95% CI: 5.56-2716.93) | Total: 1.1% | Median: 6y<br>Mean: 7.5y<br>Range: 3-26y | 973 (100%)  |
| Rubino, 2003 [16]  | Sweden/ Italy/ France | Serious  | <b>RR</b> : The occurrence of second primary solid cancers depending on the cumulative RAI activity administered, patients treated with external radiotherapy excluded. | ≤0.2 GBq: 1.0 (reference)<br>0.2–3.6 GBq: 1.2 (95% CI: 0.9–1.5)<br>3.7–7.3 GBq: 0.9 (95% CI: 0.7–1.2)<br>7.4–14.7 GBq: 1.4 (95% CI: 1.0–2.1)<br>≥14.8 GBq: 1.5 (95% CI: 0.8–2.6)                                            | Total: 8.4% | Mean: 13y<br>Range: 2-55y                | 6,841 (62%) |

**Occurrence of SHM in patients treated with RAI versus without RAI**

| Study               | Cohort/Country      | Risk of Bias | Measure                                                                                                                                              | Data                                                                                 | Crude Incidence                                                        | Follow-up period               | Participants (RAI rate) |
|---------------------|---------------------|--------------|------------------------------------------------------------------------------------------------------------------------------------------------------|--------------------------------------------------------------------------------------|------------------------------------------------------------------------|--------------------------------|-------------------------|
| Molenaar, 2018 [41] | SEER, U.S.          | Moderate     | <b>SIR</b> for all SHMs combined, additional risk from RAI                                                                                           | 1.30 (95% CI: 1.12–1.51)                                                             | Total: 0.53%                                                           | Median: 6.6y<br>IQR: 3.3-11.2y | 148,215 (47%)           |
| Rubino, 2003 [16]   | Sweden/Italy/France | Serious      | <b>RR</b> , stratified by study group and adjusted for external radiotherapy: I-131 vs. no I-131 for the outcome leukemia                            | 2.5 (95% CI: 1.0–7.4)                                                                | Total: 18/6,841 (0.26%)                                                | Mean: 13y<br>Range: 2-55y      | 6,841 (62%)             |
| Teng, 2016 [21]     | Taiwan              | Serious      | <b>aHR</b> of cumulative RAI activity <b>per 30 mCi [1.1 GBq]</b> increase; patients receiving external beam radiation or chemotherapy were excluded | Leukemia: 1.03 (95% CI: 1.02–1.04)<br>Non-Hodgkin Lymphoma: 0.86 (95% CI: 0,73-1,00) | Leukemia: 19/20,235 (0.09%)<br>Non-Hodgkin Lymphoma: 26/20,235 (0.13%) | Median: 5.9y<br>IQR: 3.1-9.9y  | 20,235 (58.3%)          |
